# Supplementary material for: Magnetic field modulated upconversion luminescence in NaYF4:Yb,Er nanoparticles
Source: Royal Society of Chemistry journal article supplement (doi:10.1039/c5tc01349f), 2015-01-01
Supplement: c5tc01349f1.pdf [file c5tc01349f1.pdf]

1     **Magnetic field modulated upconversion luminescence in**

2                     **NaYF<sub>4</sub>: Yb, Er nanoparticles**

3 P. Chen,<sup>a</sup> H. Jia,<sup>a</sup> Z. Zhong,<sup>b</sup> J. Han,<sup>\*b</sup> Q. Guo,<sup>a</sup> J. Zhou,<sup>c</sup> X. Liu,<sup>\*a</sup> J. Qiu<sup>\*ad</sup>

4 <sup>a</sup> Department of Materials Science and Engineering, Zhejiang University, Hangzhou

5 310027, China

6 <sup>b</sup> Wuhan National High Magnetic Field Center, Huazhong University of Science and

7 Technology, Wuhan 430074, China

8 <sup>c</sup> College of Materials Science and Engineering, China Jiliang University, Hangzhou

9 310018, China.

10 <sup>d</sup> State Key Laboratory of Luminescent Materials and Devices, South China University

11 of Technology, Guangzhou 510640, China

12

13 **Contents:**

14 **1. Experimental Section**

15 **2. Figures S1-S6**

16

17

18

19

20

21

22

## 1 **1. Experimental Section**

2  $\text{Y}(\text{Ac})_3 \cdot 4\text{H}_2\text{O}$  (99.99%),  $\text{Yb}(\text{Ac})_3 \cdot 4\text{H}_2\text{O}$  (99.99%),  $\text{Ho}(\text{Ac})_3 \cdot 4\text{H}_2\text{O}$  (99.99%) were  
3 purchased from Ansheng inorganic materials center Ganzhou in China. NaOH,  $\text{NH}_4\text{F}$ ,  
4 1-octadecene (ODE), and oleic acid (OA), SYLGARD silicone elastomer 184, curing  
5 agent were purchased from Sigma-Aldrich. Cyclohexane was purchased from Wako  
6 Pure Chemical Industries, Ltd. All of the chemicals were used as starting materials  
7 without further purification.

### 8 **1.1 Synthesis of lanthanide doped $\text{NaYF}_4$ nanoparticles.**

9 The  $\text{NaYF}_4$ : 18% Yb, 2% Er nanoparticles were prepared by the co-precipitation  
10 method.<sup>1</sup> In a typical procedure, 3.80 mL  $\text{Y}(\text{Ac})_3 \cdot 4\text{H}_2\text{O}$ , 0.36 mL  $\text{Yb}(\text{Ac})_3 \cdot 4\text{H}_2\text{O}$ , 0.04  
11 mL  $\text{Er}(\text{Ac})_3 \cdot 4\text{H}_2\text{O}$  were mixed with 6 mL of OA and 14 mL of ODE in a 50 mL three-  
12 neck round-bottom flask. The resulting mixture was heated to 155 °C for 30 min to  
13 form a clear solution and then cooled down to room temperature. Thereafter, 10 mL of  
14 methanol solution containing 1.8 mmol  $\text{NH}_4\text{F}$  and 2.0 mmol NaOH was added, and the  
15 solution was stirred at 50 °C for 30 min. After methanol was evaporated, the solution  
16 was heated to 290 °C under Ar flow with vigorous stirring for 90 min and then cooled  
17 down to room temperature. The obtained nanoparticles were precipitated by ethanol,  
18 collected by centrifugated, washed with ethanol for several times, and finally re-  
19 dispersed in cyclohexane. The  $\text{NaYF}_4$ : 2% Er nanoparticles were synthesized by the  
20 same method with the volume of  $\text{Y}(\text{Ac})_3 \cdot 4\text{H}_2\text{O}$  and  $\text{Er}(\text{Ac})_3 \cdot 4\text{H}_2\text{O}$  are 3.96 mL and  
21 0.04 mL, respectively.

1

## 2 **1.2 Synthesis of nanoparticles/PDMS composites.**

3 The prepared nanoparticles were dispersed in 15 mL cyclohexane solution. The  
4 mixture liquid of SYLGARD silicone elastomer 184, curing agent and dispersed  
5 nanoparticle solution with the volume ratio of 10: 1: 1 were mixed for an hour, then  
6 aged overnight and heated at 85 °C for an hour to form a transparent solid.

## 7 **1.3 X-Ray Diffraction (XRD) and High-resolution Transmission Electron** 8 **Microscopy (HRTEM)**

9 X-ray diffraction pattern of the dry powder was obtained on a RIGAKU D/MAX  
10 2550/PC diffractometer (Japan) using Cu K $\alpha$  radiation ( $\lambda = 1.5406 \text{ \AA}$ ). HRTEM  
11 analysis was performed on a FEG-TEM (Tecnai G2 F30 S-Twin, Philips-FEI,  
12 Netherlands) operated at 300 kV.

## 13 **1.4 Measurement of UC luminescence spectra under pulse magnetic field**

14 The luminescence spectra of nanoparticles were measured by the home-built  
15 luminescence spectroscopy system equipped with a pulsed magnetic field. The 975 nm  
16 laser was employed as the excitation source and coupled into a fiber to pump the  
17 nanoparticles. The nanoparticles were put at the center of the pulsed magnetic field  
18 generated by a resistive coil magnet. luminescence spectra were collected by the same  
19 fiber system with the emitted photons transmitted to the detection part and detected by  
20 a spectrometer, which is equipped with an electron multiplying charge coupled device  
21 (CCD) detector.

22

1

2

3 **2. Figure S1**

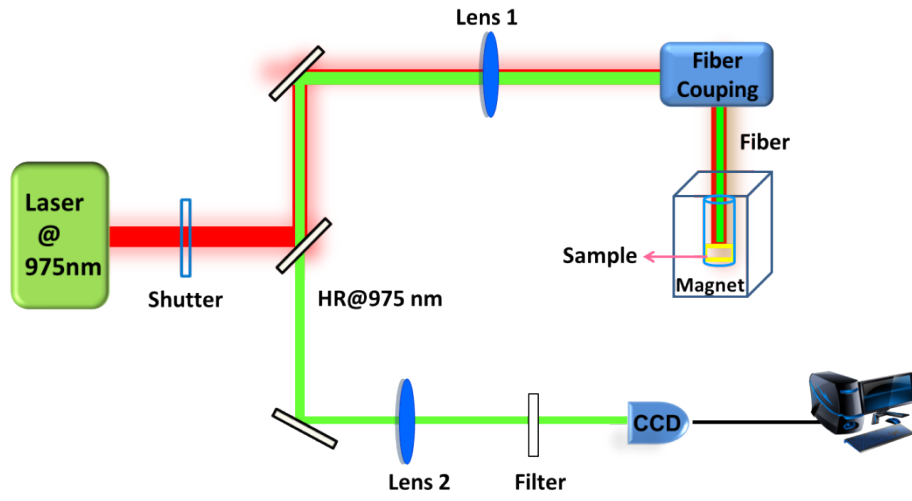

4

5 **Fig. S1** Schematic diagram of luminescence spectroscopy test system equipped with a

6 pulsed magnetic field.

7

8

9

10

11

12

13

14

15

16

17

1

2

3 **3. Figure S2**

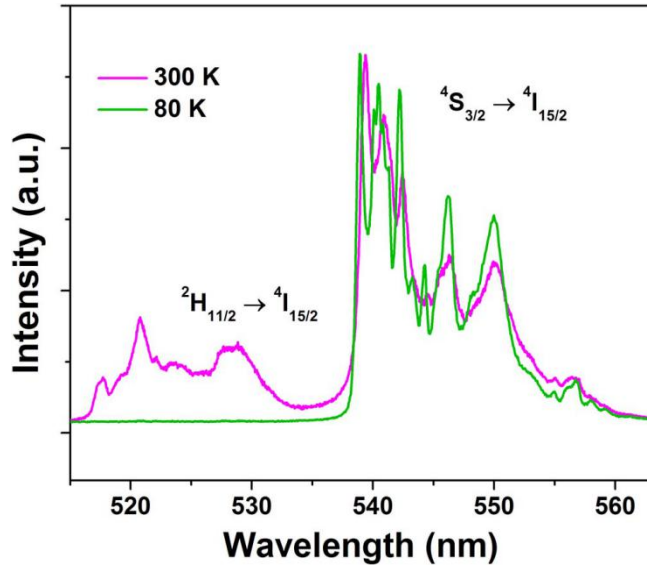

4

5 **Fig. S2** Luminescence spectra of NaYF<sub>4</sub>: Yb, Er nanoparticles at room temperature and

6 80 K under the excitation of 975 nm.

7

8

9

10

11

12

13

14

15

16

1

2

3 **4. Figure S3**

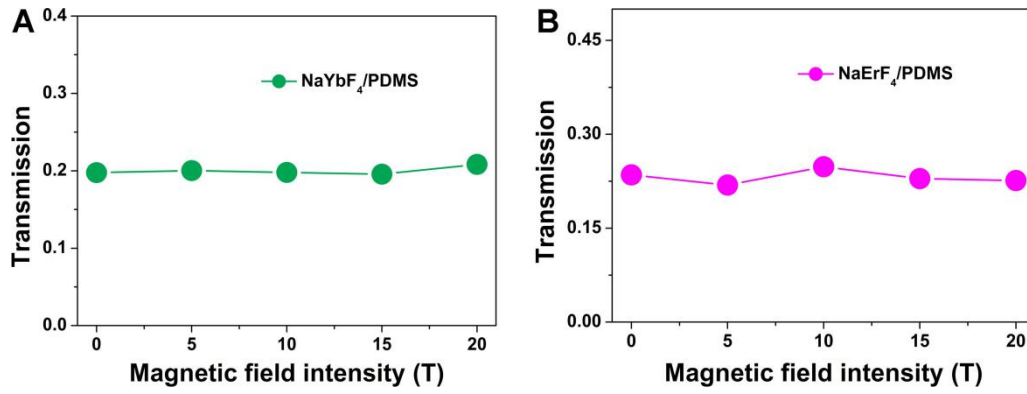

4

5 **Fig. S3** Dependence of transmittance at 975 nm of PDMS doped with NaYbF<sub>4</sub> (A) and

6 NaErF<sub>4</sub> (B) nanoparticles on magnetic field intensity.

7

8

9

10

11

12

13

14

15

16

17

18

1

2

3 **5. Figure S4**

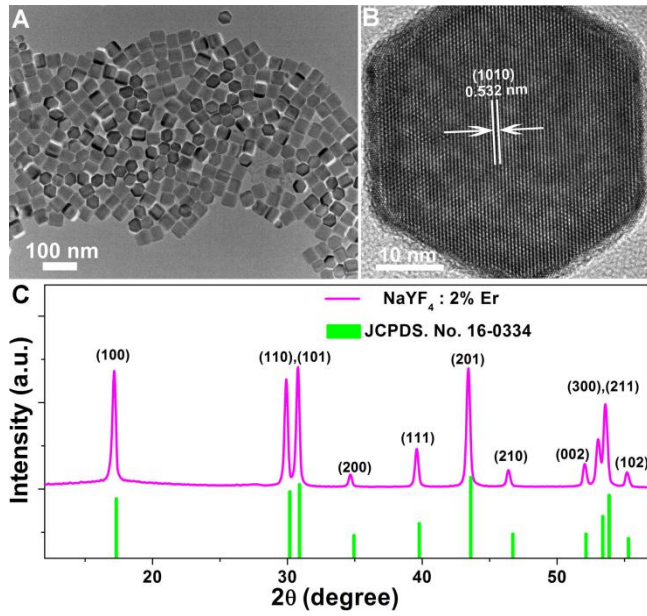

4

5 **Fig. S4** A) TEM image of NaYF<sub>4</sub>: 2% Er nanoparticles. B) HRTEM image of NaYF<sub>4</sub>:

6 2% Er nanoparticles. C) XRD patterns of NaYF<sub>4</sub>: 2% Er nanoparticles.

7

8

9

10

11

12

13

14

15

16

1

2

3 **6. Figure S5**

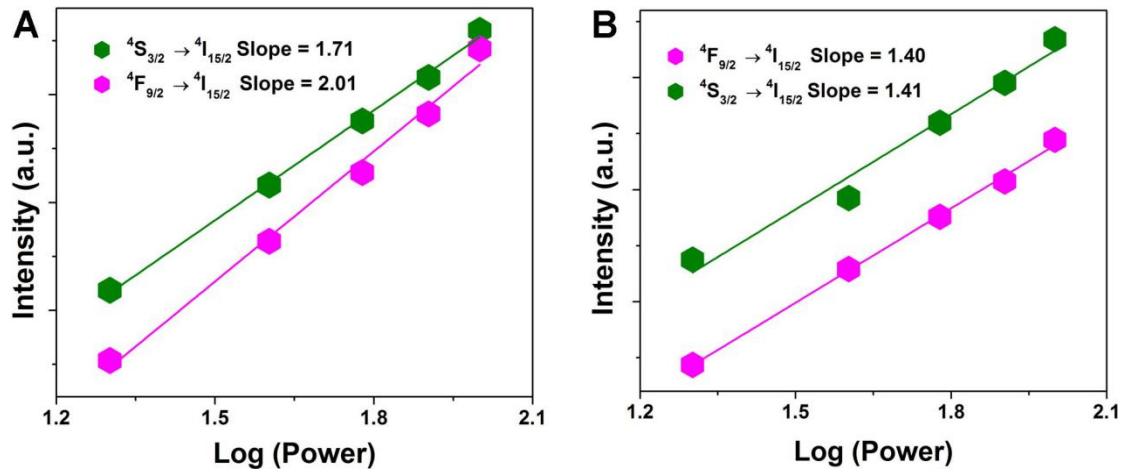

4

5 **Fig. S5** Dependences of upconversion luminescence intensity on the excitation power

6 for NaYF<sub>4</sub>: 18%Yb, 2%Er (A) and NaYF<sub>4</sub>: 2%Er (B) nanoparticles.

7

8

9

10

11

12

13

14

15

16

17



1

2

3 **7. Figure S6**

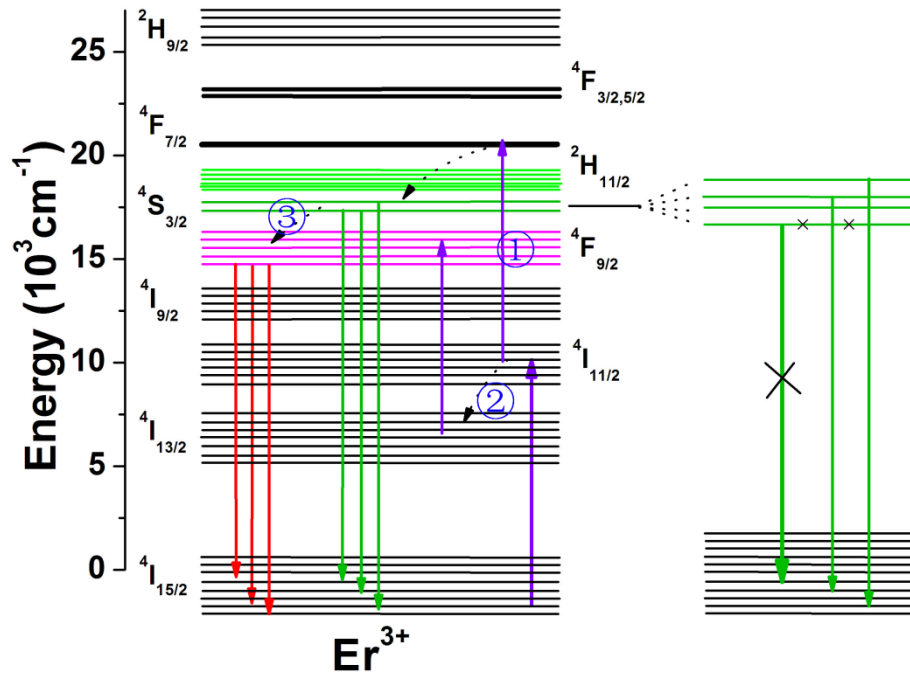

4

5 **Fig. S6** Energy level diagram of  $\text{Er}^{3+}$  in  $\text{NaYF}_4$  nanoparticles with the transitions might

6 be involved in the presence of magnetic field.

7

8

9

10

11

12

13

14

15

1

2

3 **REFERENCE**

4 1. F. Wang, Y. Han, C. S. Lim, Y.o Lu, J. Wang, J. Xu, H. Chen, C. Zhang, M. Hong,

5 and X. Liu, *Nature*, 2010, **463**, 1061.
